# Supplementary material for: A fluorescence based immunochromatographic sensor for monitoring chlorpheniramine and its comparison with a gold nanoparticle-based lateral-flow strip
Source: Royal Society of Chemistry journal article supplement (doi:10.1039/d1an00423a), 2021-01-01
Supplement: d1an00423a1.pdf [file d1an00423a1.pdf]

**Fluorescence based immunochromatographic sensor for monitoring  
chlorpheniramine and its comparison with a gold nanoparticle-based  
lateral-flow strip**

**(Supplementary Material)**

## Contents

**Fig. S1** Scanning electron microscope image of fluorescent microsphere and gold nanoparticle.

**Fig. S2** Optimization of suspension buffer with different surfactant reagents: A = basic buffer, B = PVP, C = PEG, D = BSA, E = Tween-20, F = ON-870. (a) FM-ICS assay, 1 represents CPM concentration of 0 ng/mL, 2 represents CPM concentration of 10 ng/mL. (b) GNP-ICS assay, 1 represents CPM concentration of 0 ng/mL, 2 represents CPM concentration of 100 ng/mL.

**Table S1** Cross-reactivity of mAbs with CPM and analogues.

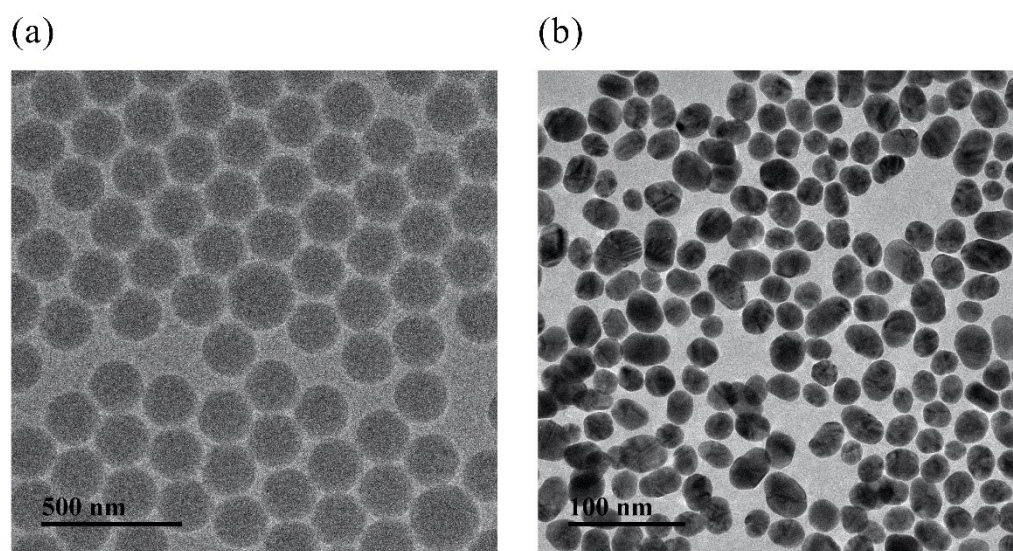

**Fig. S1** Scanning electron microscope image of (a) fluorescent microsphere and (b) gold nanoparticle.

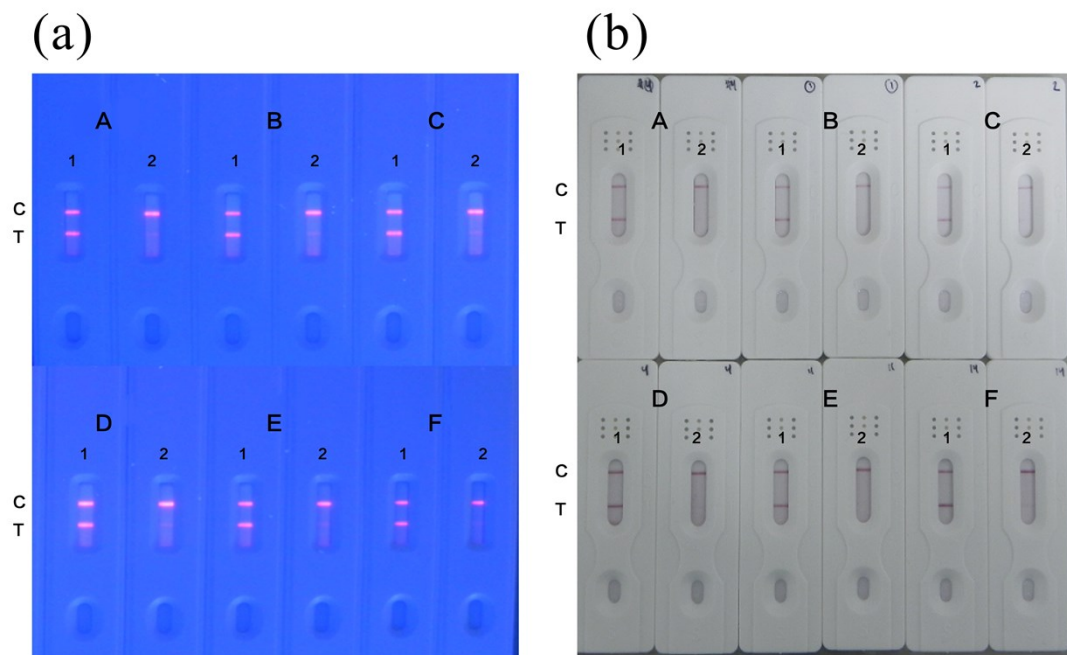

**Fig. S2** Optimization of suspension buffer with different surfactant reagents: A = basic buffer, B = PVP, C = PEG, D = BSA, E = Tween-20, F = ON-870. (a) FM-ICS assay, 1 represents CPM concentration of 0 ng/mL, 2 represents CPM concentration of 10 ng/mL. (b) GNP-ICS assay, 1 represents CPM concentration of 0 ng/mL, 2 represents CPM concentration of 100 ng/mL.

**Table S1** Cross-reactivity of mAbs with CPM and analogues.

| Chemical compound | Structure                                                                           | IC <sub>50</sub> (ng/mL) | Cross-reaction (%) |
|-------------------|-------------------------------------------------------------------------------------|--------------------------|--------------------|
| Chlorpheniramine  | 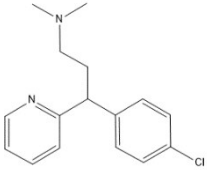   | 0.98                     | 100                |
| Diphenhydramine   |    | > 50                     | < 1.8              |
| Loratadine        |   | > 50                     | < 1.8              |
| Terfenadine       |  | > 50                     | < 1.8              |
| Astemizole        |  | > 50                     | < 1.8              |
| Cetirizine        |  | > 50                     | < 1.8              |
